# Supplementary material
Source: PubMed Central journal article supplement (PMC7082200)
Supplement: NIHMS1541327-supplement-1.pdf [file NIHMS1541327-supplement-1.pdf]

1

2 **Supplemental data**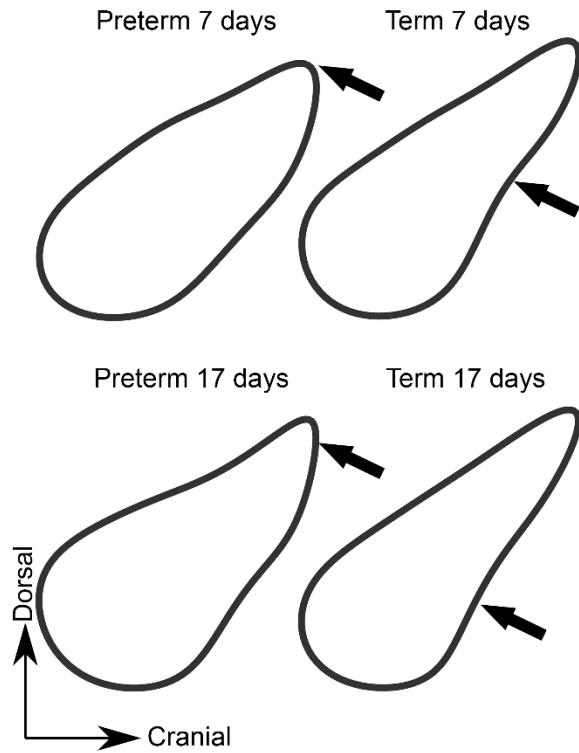

3

4 **Figure S1.** Calculated mean bolus shape for preterm and term and days seven and 17. Black  
 5 arrows indicate inflection point of the tongue as an indication of differences in size. Note the  
 6 more elongated cranial extension of the term boluses, especially at day 17.

7

8

## 9 Table S1. Manova results of bolus shape.

|                | F      | p      |
|----------------|--------|--------|
| Age            | 25.4   | <0.001 |
| Birth age      | 389.1* | <0.001 |
| Age:Birth age  | 13.5   | <0.001 |
| Individual     | 18.2   | <0.001 |
| Age:Individual | 6.6    | <0.001 |

10 \*Although the p value for all results is statistically significant, birth age drives differences between groups  
11 to a much greater degree than other factors.

12

13

14
